# Supplementary material
Source: PubMed Central journal article supplement (PMC9573798)
Supplement: NIHMS1839654-supplement-Appendix.pdf [file NIHMS1839654-supplement-Appendix.pdf]

Appendix Table. Analysis of Participants Missing Responses on Child COVID Vaccine Intentions

| Vaccine Analysis - Missing Responses     |       |                                     |                                      |                     |                                   |
|------------------------------------------|-------|-------------------------------------|--------------------------------------|---------------------|-----------------------------------|
| <i>Percentages are out of row totals</i> |       |                                     |                                      |                     |                                   |
| Black, Indigenous, Persons of Color      |       |                                     |                                      |                     |                                   |
|                                          |       | No                                  | Yes                                  | Total               | Fisher's exact p-value:           |
| Missing Child COVID Vaccine Intention    | No    | 261 (87.3%)                         | 38 (12.7%)                           | 299                 | <b>.003</b>                       |
|                                          | Yes   | 9 (56.3%)                           | 7 (43.8%)                            | 16                  |                                   |
|                                          | Total | 270                                 | 45                                   |                     |                                   |
| Age                                      |       |                                     |                                      |                     |                                   |
|                                          |       | Age - 18 - 29                       | Age - 30 - 44                        | Age - 45 +          |                                   |
| Missing Child COVID Vaccine Intention    | No    | 10 (3.3%)                           | 184 (61.5%)                          | 105 (35.1%)         | <b>&lt; .000</b>                  |
|                                          | Yes   | 0 (0%)                              | 7 (43.8%)                            | 4 (25%)             |                                   |
|                                          | Total | 10                                  | 191                                  | 109                 |                                   |
| Female                                   |       |                                     |                                      |                     |                                   |
|                                          |       | No                                  | Yes                                  | Total               |                                   |
| Missing Child COVID Vaccine Intention    | No    | 40 (13.4%)                          | 259 (86.6%)                          | 299                 | .018                              |
|                                          | Yes   | 6 (37.5%)                           | 10 (62.5%)                           | 16                  |                                   |
|                                          | Total | 46                                  | 269                                  |                     |                                   |
| Income                                   |       |                                     |                                      |                     |                                   |
|                                          |       | Income - ≤ \$49,999                 | Income - \$50,000 - \$99,999         | Income - ≥ \$99,999 |                                   |
| Missing Child COVID Vaccine Intention    | No    | 47 (15.7%)                          | 81 (27.1%)                           | 165 (55.2%)         | <b>&lt; .000</b>                  |
|                                          | Yes   | 4 (25%)                             | 5 (31.3)                             | 2 (12.5%)           |                                   |
|                                          | Total | 51                                  | 86                                   | 167                 |                                   |
| Child Age                                |       |                                     |                                      |                     |                                   |
|                                          |       | Currently pregnant - No             | Currently pregnant - Yes             | Total               |                                   |
| Missing Child COVID Vaccine Intention    | No    | 282 (94.3%)                         | 17 (5.7%)                            | 299                 | 1<br>1-Sided Fisher's exact: .619 |
|                                          | Yes   | 15 (93.8%)                          | 1 (6.3%)                             | 16                  |                                   |
|                                          | Total | 297                                 | 18                                   |                     |                                   |
| Child Age                                |       |                                     |                                      |                     |                                   |
|                                          |       | Infant/toddler (0-2 years old) - No | Infant/toddler (0-2 years old) - Yes | Total               |                                   |
| Missing Child COVID Vaccine Intention    | No    | 218 (72.9%)                         | 81 (27.1%)                           | 299                 | .015                              |
|                                          | Yes   | 16 (100%)                           | 0 (0%)                               | 16                  |                                   |

|                                       |       |                                             |                                              |       |                              |
|---------------------------------------|-------|---------------------------------------------|----------------------------------------------|-------|------------------------------|
|                                       | Total | 234                                         | 81                                           |       |                              |
|                                       |       | Child Age                                   |                                              |       |                              |
|                                       |       | Preschool (3-5 years old) - No              | Preschool (3-5 years old) - Yes              | Total |                              |
| Missing Child COVID Vaccine Intention | No    | 203 (67.9%)                                 | 96 (32.1%)                                   | 299   | 1                            |
|                                       | Yes   | 11 (68.8%)                                  | 5 (31.3)                                     | 16    | 1-Sided Fisher's exact: .591 |
|                                       | Total | 214                                         | 101                                          |       |                              |
|                                       |       | Child Age                                   |                                              |       |                              |
|                                       |       | School age (6-12 years old) - No            | School age (6-12 years old) - Yes            | Total |                              |
| Missing Child COVID Vaccine Intention | No    | 147 (49.2%)                                 | 152 (50.8%)                                  | 299   | .319                         |
|                                       | Yes   | 10 (62.5%)                                  | 6 (37.5%)                                    | 16    | 1-Sided Fisher's exact: .217 |
|                                       | Total | 157                                         | 158                                          |       |                              |
|                                       |       | Child Age                                   |                                              |       |                              |
|                                       |       | Adolescent/ Teenager (13-17 years old) - No | Adolescent/ Teenager (13-17 years old) - Yes | Total |                              |
| Missing Child COVID Vaccine Intention | No    | 194 (64.9%)                                 | 105 (35.1%)                                  | 299   | .279                         |
|                                       | Yes   | 13 (81.3%)                                  | 3 (18.8%)                                    | 16    | 1-Sided Fisher's exact: .140 |
|                                       | Total | 207                                         | 108                                          |       |                              |
|                                       |       | Child Age                                   |                                              |       |                              |
|                                       |       | Young Adult (18-26 years old) - No          | Young Adult (18-26 years old) - Yes          | Total |                              |
| Missing Child COVID Vaccine Intention | No    | 264 (88.3%)                                 | 35 (11.7%)                                   | 299   | 1                            |
|                                       | Yes   | 15 (93.8%)                                  | 1 (6.3%)                                     | 16    | 1-Sided Fisher's exact: .434 |
|                                       | Total | 279                                         | 36                                           |       |                              |
